# Supplementary material for: Fate of organohalogens in US wastewater treatment plants and estimated chemical releases to soils nationwide from biosolids recycling
Source: Royal Society of Chemistry journal article supplement (doi:10.1039/b914324f), 2009-01-01
Supplement: b914324f.pdf [file b914324f.pdf]

**Fate of Organohalogens in U.S. Wastewater Treatment Plants and Estimated  
Chemical Releases to Soils Nationwide from Biosolids Recycling**

*Jochen Heidler and Rolf U. Halden\**

8 Pages

\* Corresponding author

## Supplemental Information

**Table S-1.** Method recoveries and method detection limits for the various analytes.

| Compound        | Recovery<br>(% $\pm$ SD) |              |                          | Method Detection Limit (ppb) |                   |                  | Limit of Quantification<br>(pg) | Calibration <b>internal</b> or<br>external<br>(R <sup>2</sup> ) |
|-----------------|--------------------------|--------------|--------------------------|------------------------------|-------------------|------------------|---------------------------------|-----------------------------------------------------------------|
|                 | Influent                 | Effluent     | Sludge                   | Influent*                    | Effluent*         | Sludge           |                                 |                                                                 |
| Carbanilide     | 77 $\pm$ 4               | 94 $\pm$ 18  | 42 $\pm$ 12              | 0.02                         | 0.01              | 1.3              | 0.1                             | <b>0.997</b>                                                    |
| DCC             | 66 $\pm$ 16              | 112 $\pm$ 15 | 69 $\pm$ 19              | 0.05                         | 0.01              | 0.9              | 0.1                             | <b>0.997</b>                                                    |
| Dichlorophene   | 66 $\pm$ 8               | 142 $\pm$ 44 | 47 $\pm$ 15              | 0.04                         | 0.03              | 0.5              | 0.1                             | 0.998                                                           |
| Diflubenzuron   | 89 $\pm$ 17              | 184 $\pm$ 12 | 60 $\pm$ 15              | 0.32                         | 0.01              | 0.4              | 5                               | 0.997                                                           |
| Fipronil        | 112 $\pm$ 4              | 165 $\pm$ 22 | 53 $\pm$ 10              | 0.02                         | 0.01              | 0.4              | 0.1                             | 0.999                                                           |
| Linuron         | 108 $\pm$ 22             | 100 $\pm$ 26 | N/A                      | 0.12                         | 0.03              | N/A              | 0.5                             | <b>0.995</b>                                                    |
| Hexachlorophene | 54 $\pm$ 6               | 16 $\pm$ 1   | 8 $\pm$ 6                | 0.06                         | 0.02              | 0.2              | 0.5                             | 0.995                                                           |
| Hexaflumuron    | 54 $\pm$ 17              | 39 $\pm$ 9   | 69 $\pm$ 13              | 0.11                         | 0.02              | 0.6              | 1                               | 0.997                                                           |
| TCC             | 81 $\pm$ 35              | 39 $\pm$ 3   | 91 $\pm$ 8 <sup>1</sup>  | 0.1                          | 0.01              | 3.9              | 25                              | <b>0.998</b>                                                    |
| TCS             | 58 $\pm$ 17              | 57 $\pm$ 17  | 78 $\pm$ 14 <sup>2</sup> | 0.25 <sup>2</sup>            | 0.02 <sup>2</sup> | 1.0 <sup>2</sup> | 25                              | <b>0.998</b>                                                    |
| TetCC           | 46 $\pm$ 7               | 37 $\pm$ 15  | 73 $\pm$ 20              | 0.04                         | 0.02              | 1.1              | 0.1                             | 0.996                                                           |

\* Italics indicates calculated data

<sup>1</sup> taken from Heidler, J.; Sapkota, A.; Halden, R. U. Partitioning, persistence, and accumulation in digested sludge of the topical antiseptic triclocarban during wastewater treatment. Environ. Sci. Technol. 2006, 40, 3634-3639.

<sup>2</sup> taken from Heidler, J.; Halden, R. U. Mass balance assessment of triclosan removal during conventional sewage treatment. Chemosphere. 2007, 66, 362-369.

**Figure S-1.** Treatment trains of wastewater treatment plants participating in this study.

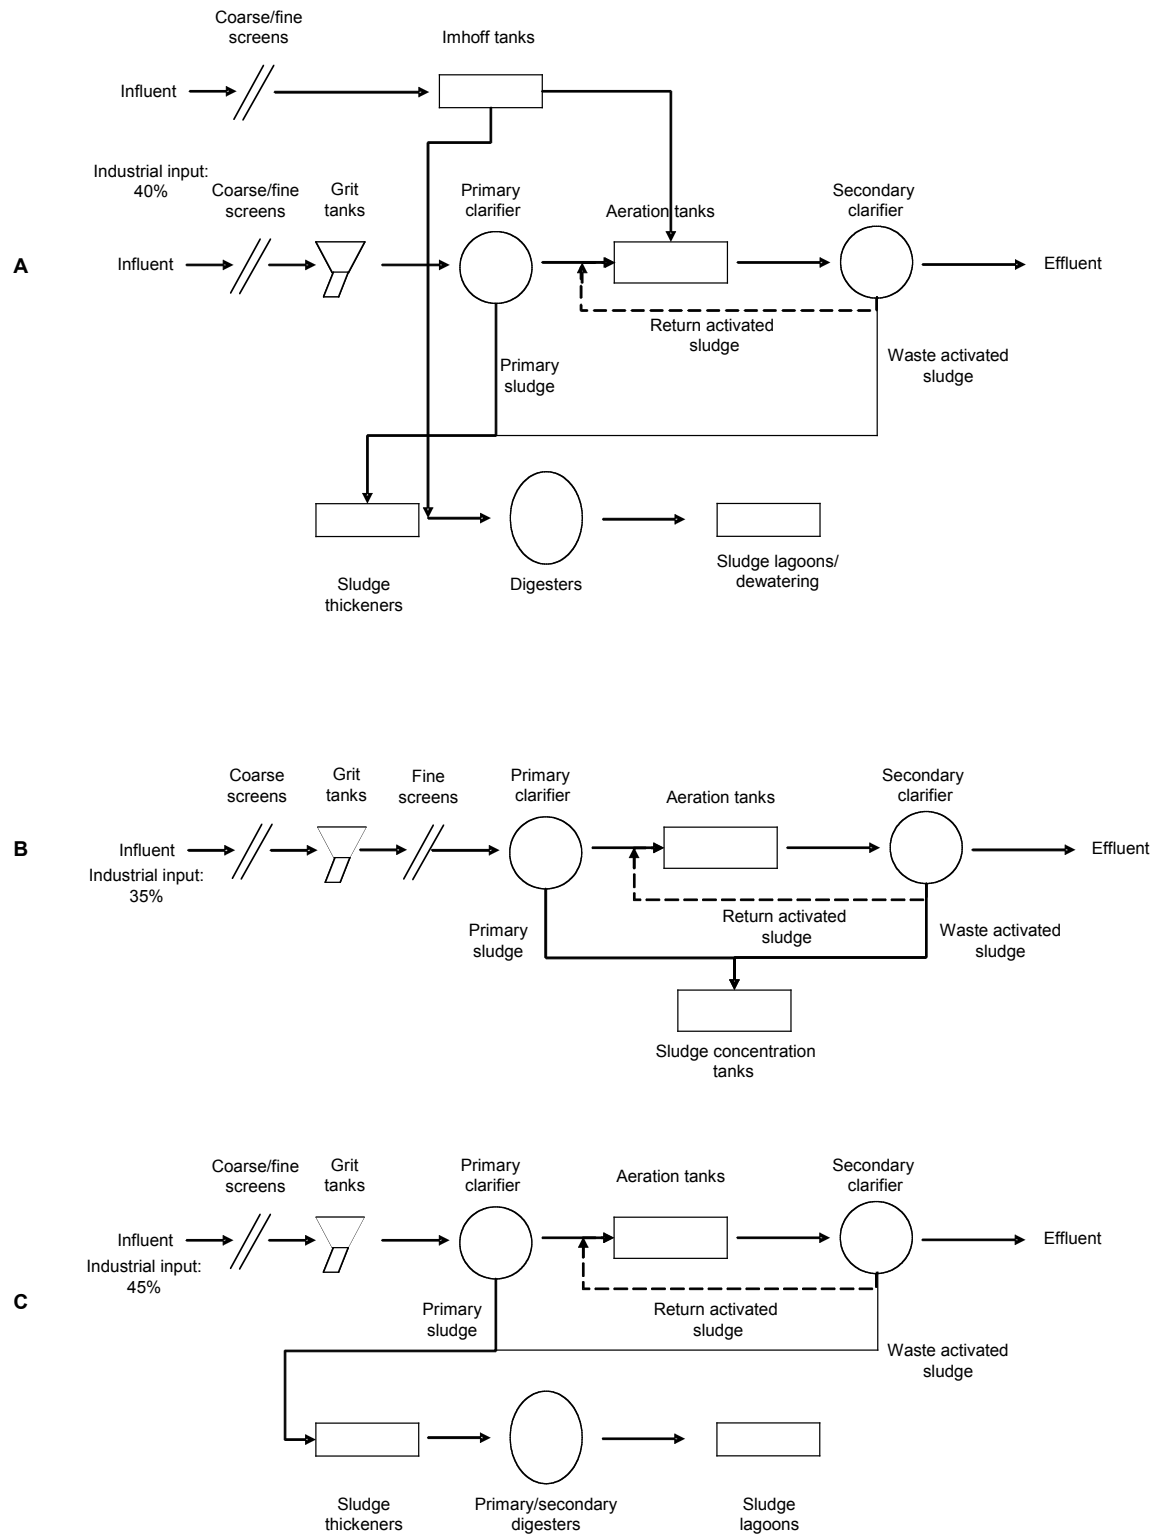

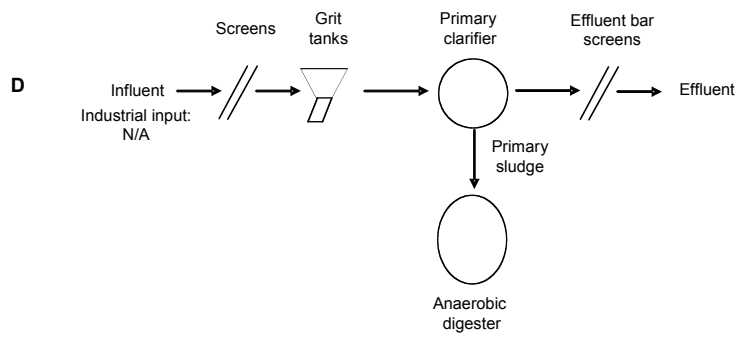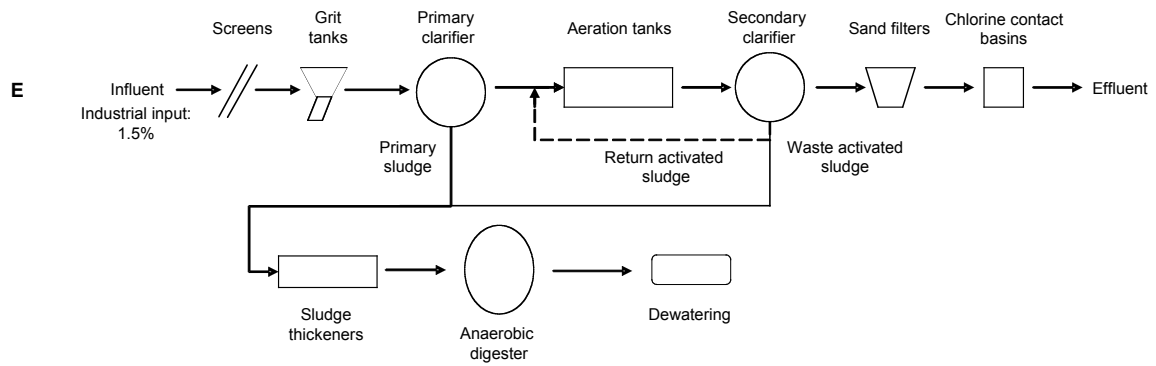

**F** N/A

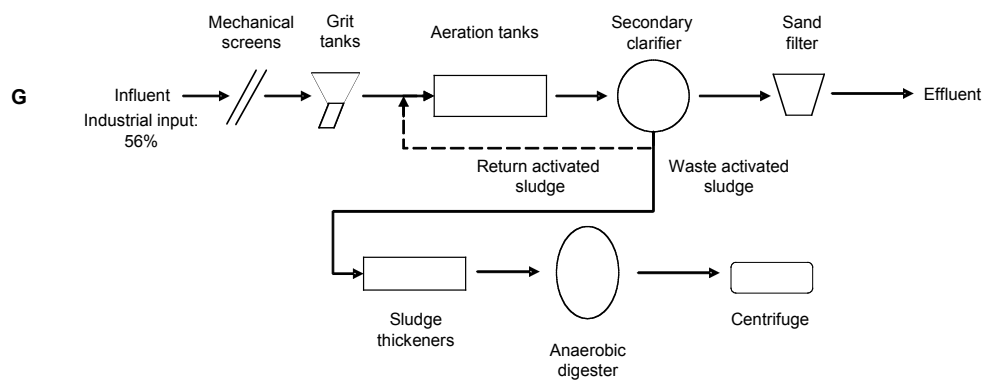

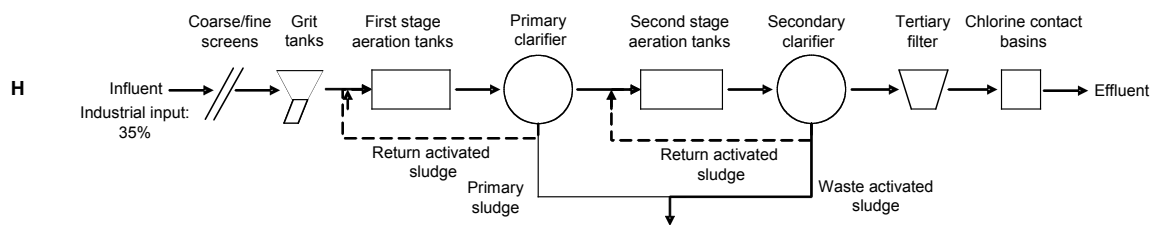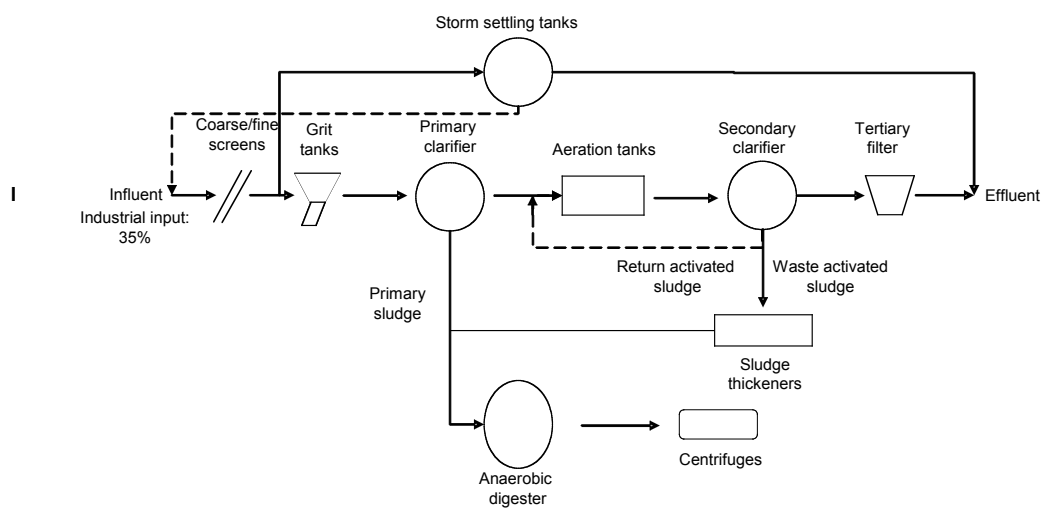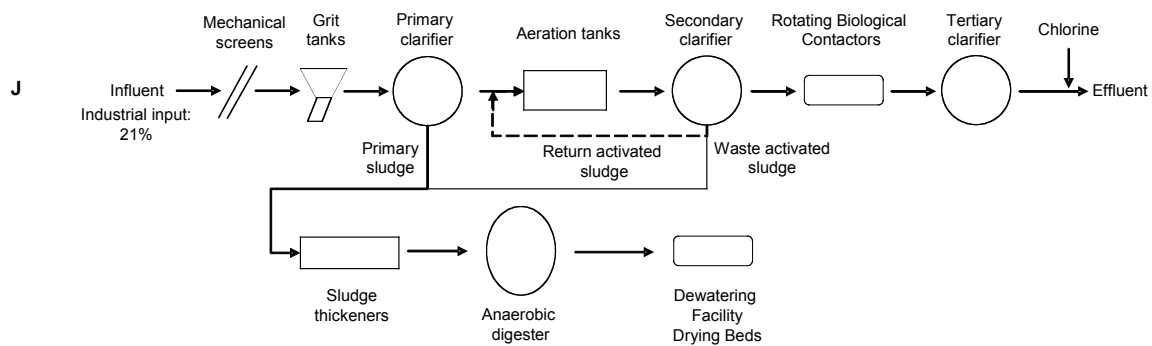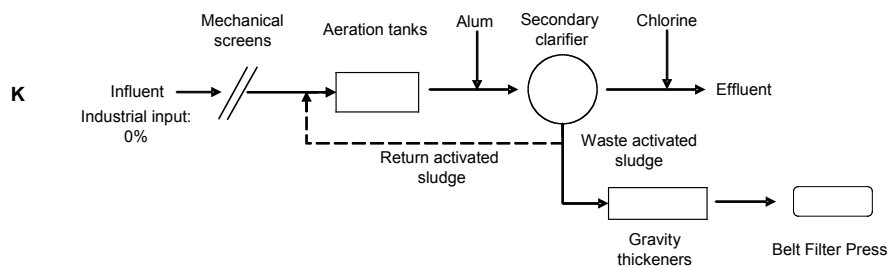

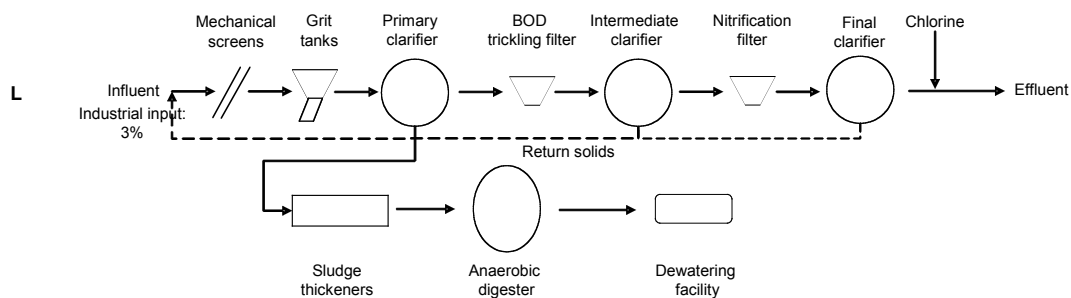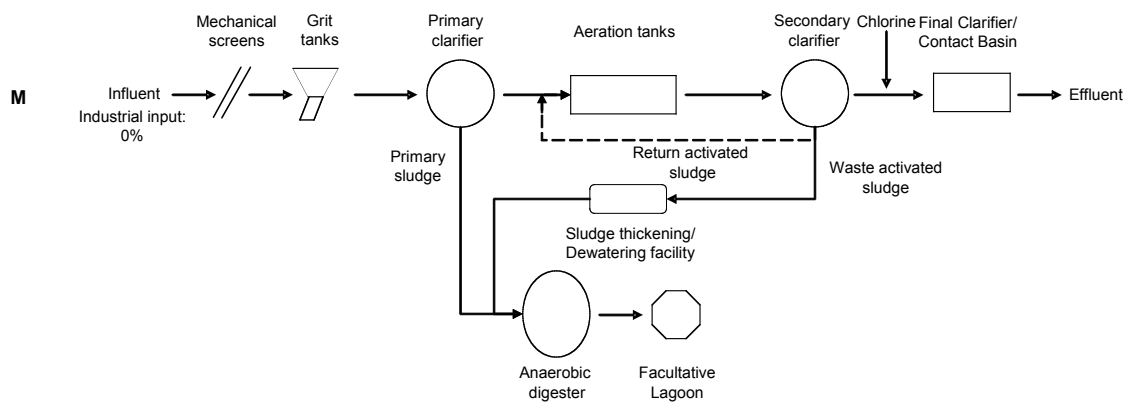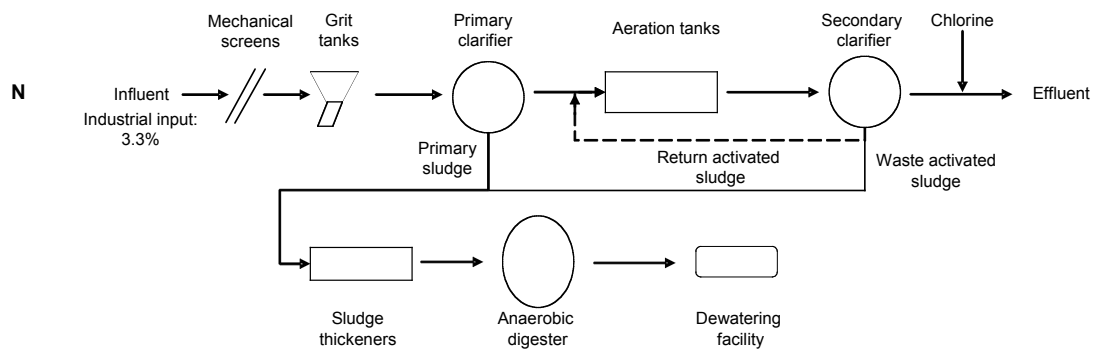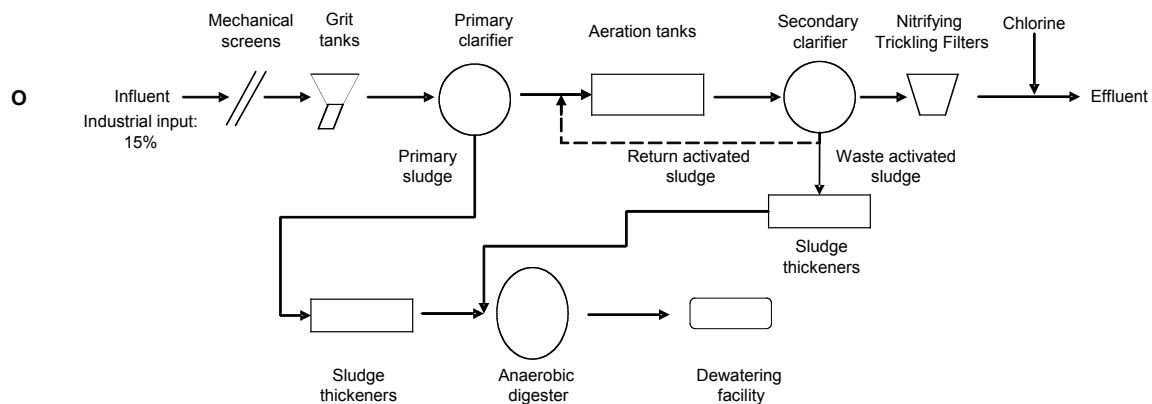

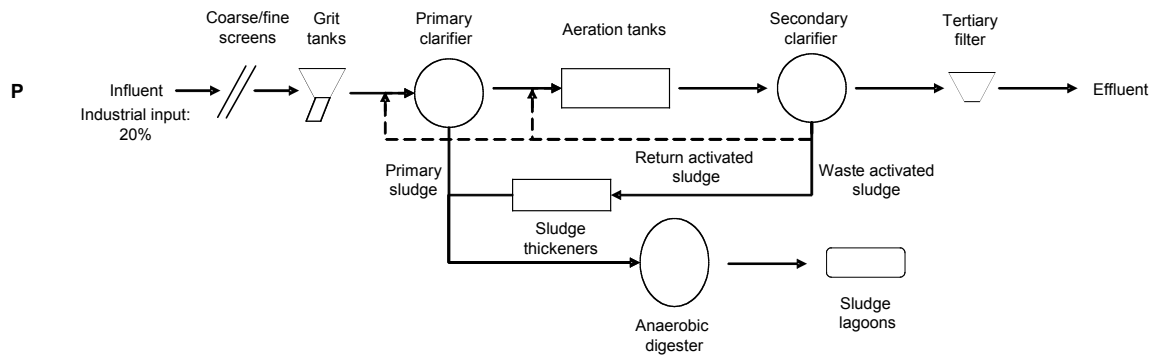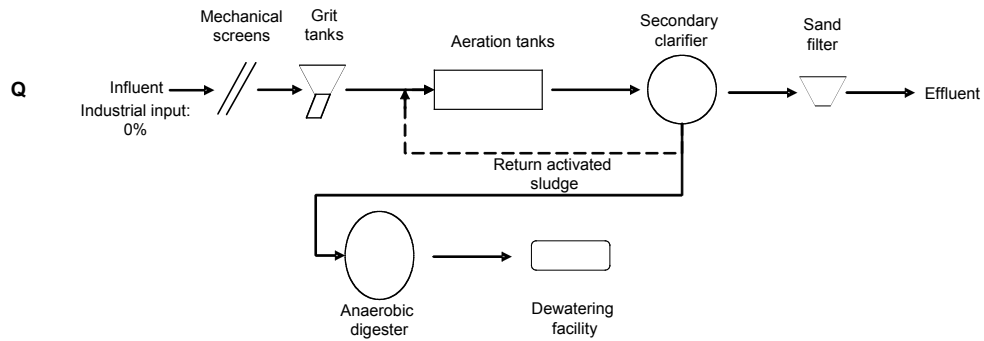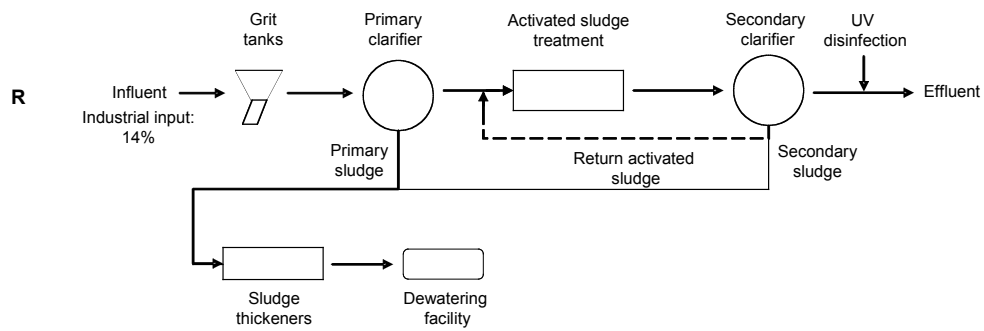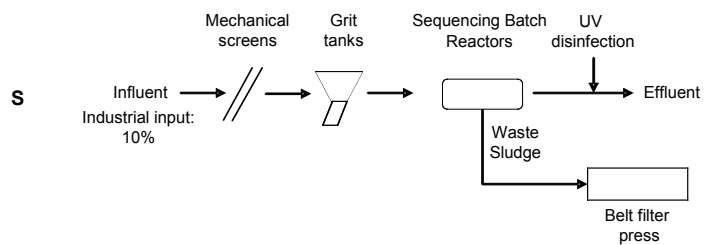



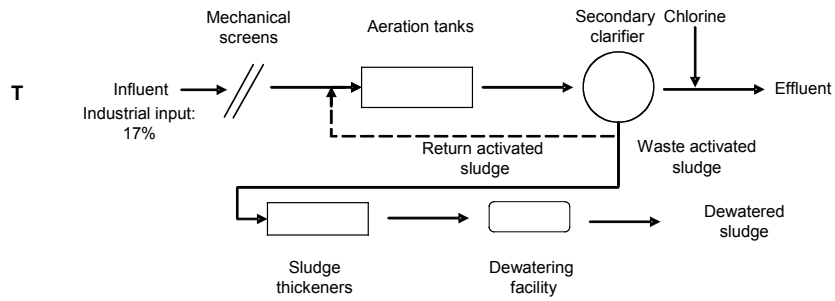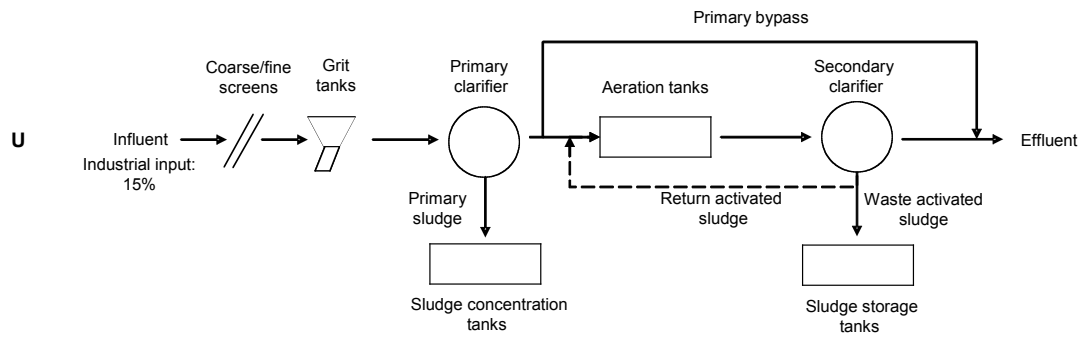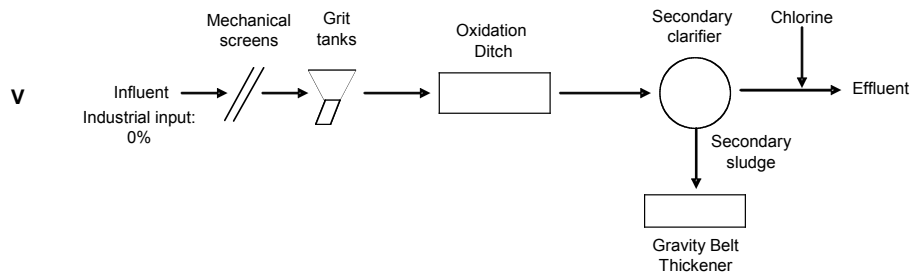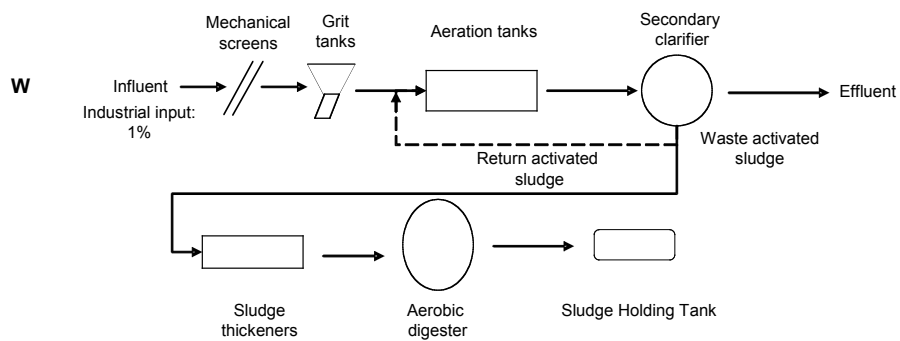

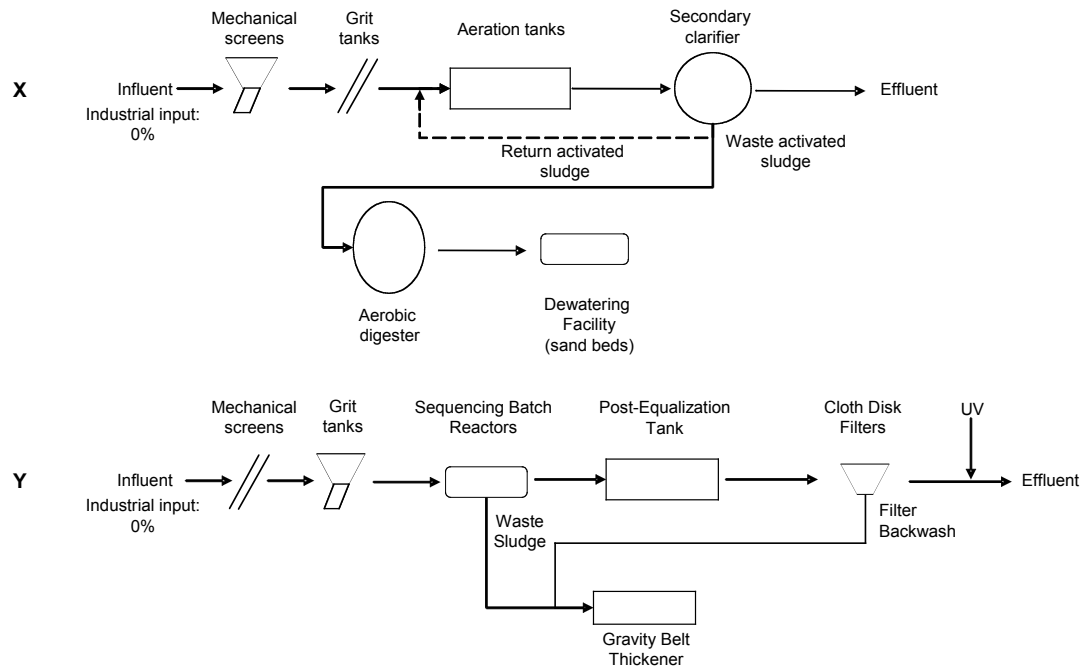

(N/A, undisclosed)
